# Supplementary material
Source: Springer Nature journal article supplement (https://www.springermedizin.de/resource/supplementary/12889_2008_1518_MOESM2_ESM.pdf/9503326)
Supplement: MOESM2 [file 9503326]

N

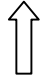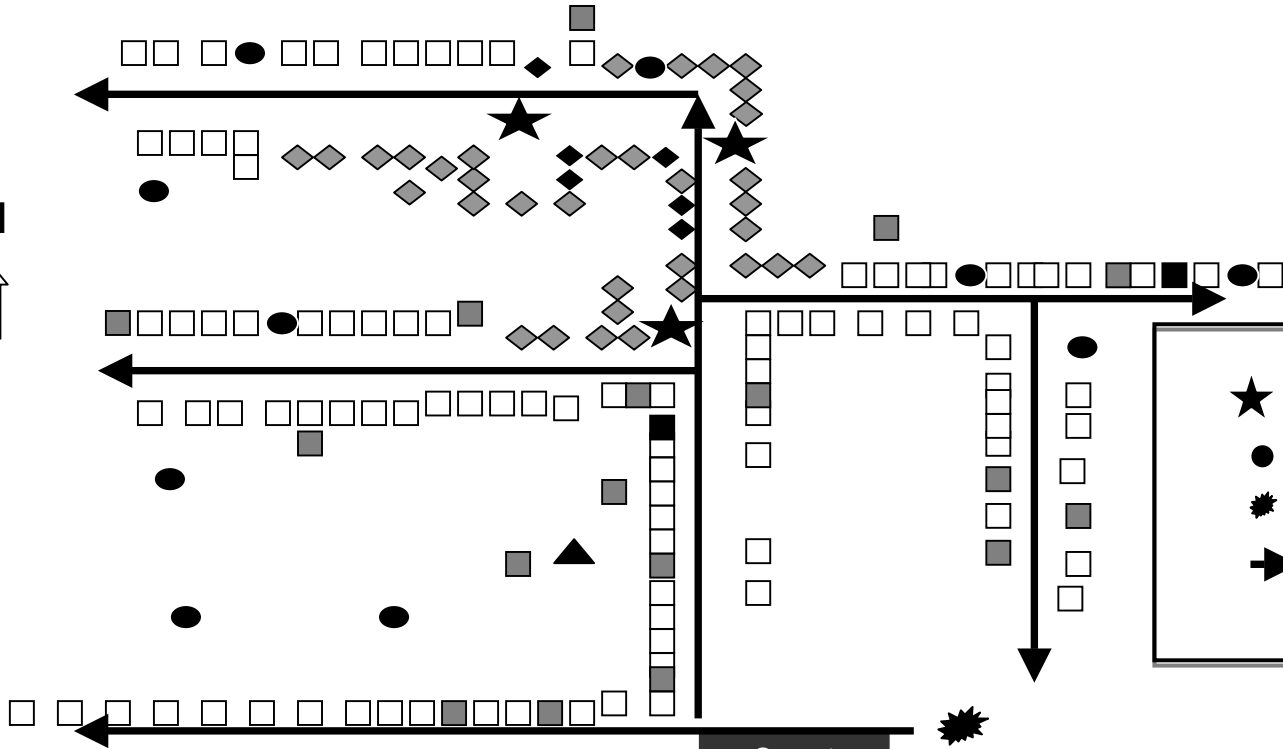

Cases who ate food from shop

Sweet Shop

Cases who did not eat food from shop

- ★ Suspected tap
- Tube well
- ⚙ Pump
- ➔ Water pipelines

- House with no case
- House with 1-2 cases
- House  $\geq 3$  cases
- ▲ Index case

- ◊ House with 1-2 cases
- ◆ House  $\geq 3$  cases
